# Supplementary material
Source: HighWire-hosted journal article supplement (https://bmjopen.bmj.com/content/13/7/e072093)
Supplement: inline-supplementary-material-3 [file inline-supplementary-material-3.pdf]

## Search strategy:

### OVID (Embase, & Global Health)

- 1) Longitudinal OR Cohort OR `follow up` OR outcome\* OR prognos\* OR prospective OR retrospective AND
- 2) Adolescen\* OR `young people` OR youth\* OR teen\* OR minor\* OR juvenile\* OR `young person\*` OR `student\*` OR `high school` OR `middle school` OR `secondary school` OR child\* OR `young women` OR `young men` OR `boy\*` OR `girl\*` AND
- 3) `Mental distress` OR depress\* OR anxiety OR anxious OR `psychological distress` OR `distress` OR `internal\* disorder` OR `internal\* behavio\*` AND
- 4) `one year` OR `12 month\*` OR `1 year`
- 5) 1 AND 2 AND 3 AND 4

### MEDLINE (via PubMed):

(Longitudinal OR Cohort OR "follow up" OR outcome\* OR prognos\* OR prospective OR retrospective) AND (("Adolescent/psychology"[Mesh]) OR "young people" OR youth OR teen\* OR minor OR juvenile\* OR "young person" OR "student\*" OR "high school" OR "middle school" OR "secondary school" OR child\* OR "young women" OR "young men" OR boy OR girl\*) AND ("Mental distress" OR ("Depression/diagnosis"[Mesh] OR "Depression/psychology"[Mesh] OR "Depression/rehabilitation"[Mesh] OR "Depression/therapy"[Mesh]) OR ("Anxiety/diagnosis"[Mesh] OR "Anxiety/psychology"[Mesh] OR "Anxiety/rehabilitation"[Mesh] OR "Anxiety/therapy"[Mesh]) OR ("Psychological Distress/diagnosis"[Mesh] OR "Psychological Distress/psychology"[Mesh] OR "Psychological Distress/rehabilitation"[Mesh] OR "Psychological Distress/therapy"[Mesh]) OR "distress" OR "internal\* disorder" OR "internal\* behavio\*" OR ("Emotions/diagnosis"[Mesh] OR "Emotions/psychology"[Mesh] OR "Emotions/rehabilitation"[Mesh] OR "Emotions/therapy"[Mesh])) AND ("one year" OR "12 month\*" OR "1 year")

#### MeSH Terms used:

"depression"  
"anxiety"  
"emotions"  
"psychological distress"  
"adolescent"

**PsycINFO**

(Longitudinal OR Cohort OR "follow up" OR outcome\* OR prognos\* OR prospective OR retrospective) AND (Adolescen\* OR "young people" OR youth OR teen\* OR minor OR juvenile\* OR "young person" OR "student\*" OR "high school" OR "middle school" OR "secondary school" OR child\* OR "young women" OR "young men" OR boy\* OR girl\*) AND ("Mental distress" OR depress\* OR anxiety OR anxious OR "psychological distress" OR "distress" OR "internal\* disorder" OR internal\* behavio\*) AND ("one year" OR "12 month\*" OR "1 year")

**Web of Science**

(Longitudinal OR Cohort OR "follow up" OR outcome\* OR prognos\* OR prospective OR retrospective) AND (Adolescen\* OR "young people" OR youth OR teen\* OR minor OR juvenile\* OR "young person" OR "student\*" OR "high school" OR "middle school" OR "secondary school" OR child\* OR "young women" OR "young men" OR boy\* OR girl\*) AND ("Mental distress" OR depress\* OR anxiety OR anxious OR "psychological distress" OR "distress" OR "internal\* disorder" OR internal\* behavio\*) AND ("one year" OR "12 month\*" OR "1 year")
