# Supplementary material
Source: HighWire-hosted journal article supplement (https://bmjopen.bmj.com/content/13/7/e072093)
Supplement: inline-supplementary-material-4 [file inline-supplementary-material-4.pdf]

| Author, year                      | Country | Setting and Population                                                                                                                                   | Study Aim                                                                                                                                            | Age at baseline    | Sample size at baseline               | Measure of depressive and/or anxiety symptoms                                                                                                                     | Cut off scores                                                                                                | One year follow-up                                        | Quality Assessment (NOS) |
|-----------------------------------|---------|----------------------------------------------------------------------------------------------------------------------------------------------------------|------------------------------------------------------------------------------------------------------------------------------------------------------|--------------------|---------------------------------------|-------------------------------------------------------------------------------------------------------------------------------------------------------------------|---------------------------------------------------------------------------------------------------------------|-----------------------------------------------------------|--------------------------|
| Fan et al., 2016                  | China   | High Schools in Dujiangyan, China; Population drawn from adolescents exposed to the 2008 Wenchuan earthquake in China.                                   | This study explored the associations between posttraumatic stress disorder, depressive symptoms, and sleep disturbance after the Wenchuan earthquake | 13 to 17 years old | 455 participants                      | Chinese version of the Depression Self-Rating Scale for Children ( <i>Self-report</i> )                                                                           | Score of 15 has been used as the cut-off for screening depressive disorders                                   | 292 participants recovered from depressive symptoms (64%) | 6                        |
| Yang et al., 2008                 | Taiwan  | Middle Schools in Taiwan; population drawn from the students                                                                                             | This study evaluated the influence of personality traits and non-severe life events on depressive episodes in adolescents from six middle schools    | 12 to 16 years old | 213 participants                      | Chinese version of the Centre for Epidemiologic Studies Depression ( <i>Self-report</i> )                                                                         | Wave 2 CES-D score becoming 28 or less by a decrease from Wave 1 CES-D score of >28                           | 107 participants recovered (50%)                          | 6                        |
| Goodyer et al., 2003              | U.K     | Three secondary schools within Cambridge; population drawn from secondary school students who met the diagnostic criteria for major depressive disorder. | This study investigated whether hormones influence recovery in a community sample of adolescents with major depression                               | 12 to 16 years old | 30 participants (depressive symptoms) | Kiddie-SADS Schedule for Schizophrenia and Affective Disorders; Mood ( <i>Clinician led scale</i> )<br><br>Mood and Feelings Questionnaire ( <i>Self-report</i> ) | -                                                                                                             | 19 participants recovered from depression (63%)           | 7                        |
| Leikanger, E & Larrison, B., 2012 | Norway  | 18 schools across 17 municipalities in Sunnmøre county in western Norway;                                                                                | This study explored the stability, incidences and changes in the DSM-IV related anxiety                                                              | 13 to 15 years old | 141 participants                      | The Screen for Child Anxiety Related Emotional Disorders (SCARED) Scale                                                                                           | Those who scored lower than 25 at baseline were defined as "low-moderate scorers", and those who scored 25 or | 67 participants had reduced symptoms of anxiety (48%)     | 5                        |

|                     |       |                                                                                        |                                                                                                                                                  |                    |                  |                                                 |                                                                                                                                                        |                                                          |   |
|---------------------|-------|----------------------------------------------------------------------------------------|--------------------------------------------------------------------------------------------------------------------------------------------------|--------------------|------------------|-------------------------------------------------|--------------------------------------------------------------------------------------------------------------------------------------------------------|----------------------------------------------------------|---|
|                     |       | population drawn from Norwegian adolescents                                            | symptoms amongst Norwegian adolescents                                                                                                           |                    |                  | (Self-report)                                   | higher were defined as "high scorers"                                                                                                                  |                                                          |   |
| Jinnin et al., 2016 | Japan | Hiroshima University in Japan; population drawn from first-year undergraduate students | This study looked at the progression of depressive symptoms and the potential risk for developing major depressive episodes in older adolescents | 18 to 19 years old | 172 participants | Japanese version of BDI-II<br><br>(Self-report) | Low-symptom group:<br>BDI-II score $\leq 10$<br><br>Middle-symptom group:<br>BDI-II score = 11–17<br><br>High-symptom group:<br>BDI-II score $\geq 18$ | 81 participants had reduced symptoms of depression (47%) | 7 |

Table 1. Characteristics of the included studies.
